# Supplementary material for: PilT and PilU are homohexameric ATPases that coordinate to retract type IVa pili
Source: PLOS journal article supplement (doi:10.1371/journal.pgen.1008448), 2019-10-18

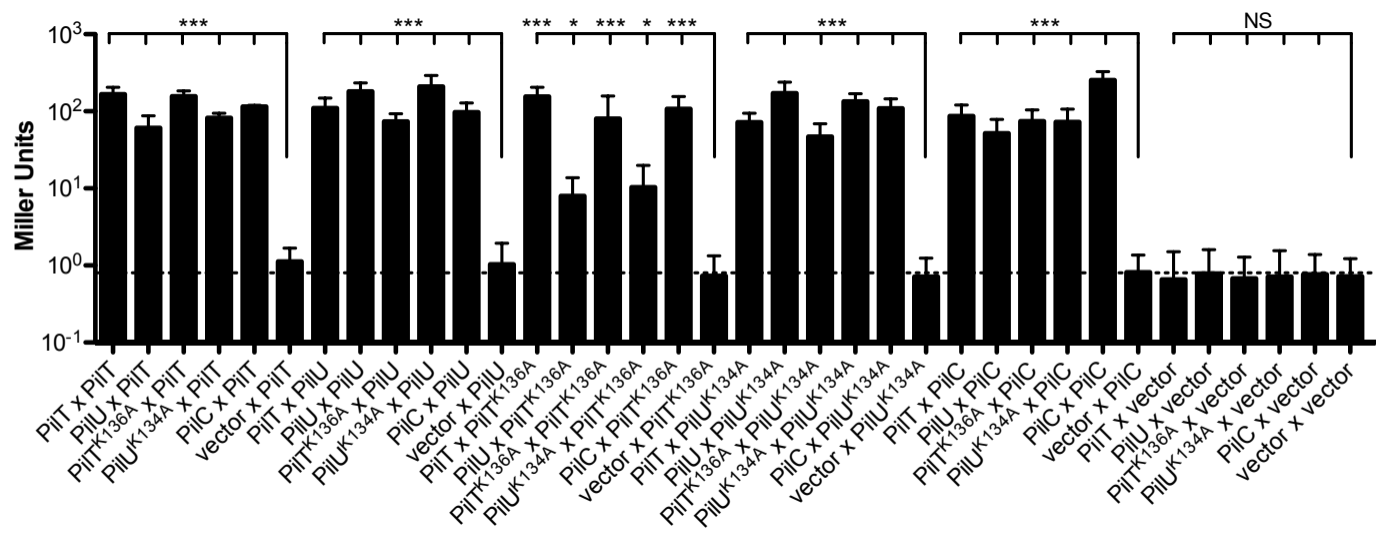

Supplement: S3 (10.1371/journal.pgen.1008448.s003) [file journal.pgen.1008448.s003]
